# Supplementary material
Source: PubMed Central journal article supplement (PMC3695605)
Supplement: NIHMS478905-supplement-SI_materials.pdf [file NIHMS478905-supplement-SI_materials.pdf]

## SUPPORTING INFORMATION

# Time Resolved Studies of Interfacial Reactions of Ozone with Pulmonary Phospholipid Surfactants Using Field Induced Droplet Ionization Mass Spectrometry

*Hugh I. Kim<sup>a</sup>, Hyungjun Kim<sup>b,c</sup>, Young Shik Shin<sup>d</sup>, Luther W. Beegle<sup>e</sup>, William A.  
Goddard<sup>b,c</sup>, James R. Heath<sup>d</sup>, Isik Kanik<sup>e</sup>, and J. L. Beauchamp<sup>d,\*</sup>*

<sup>a</sup>Department of Chemistry, Pohang University of Science and Technology (POSTECH), Pohang, 790-784, Republic of Korea

<sup>b</sup>Graduate School of EEWS, Korea Advanced Institute of Science and Technology, Daejeon, 305-701, Republic of Korea

<sup>c</sup>Materials and Process Simulation Center, Beckman Institute, California Institute of Technology, Pasadena, CA 91125,

<sup>d</sup>Noyes Laboratory of Chemical Physics, California Institute of Technology, Pasadena, CA 91125,

<sup>e</sup>Jet Propulsion Laboratory, California Institute of Technology, Pasadena, CA 91109,

| <b><u>Contents</u></b> | <b><u>page</u></b> |
|------------------------|--------------------|
| Figure S1              | S2                 |
| Complete Ref. (21)     | S3                 |

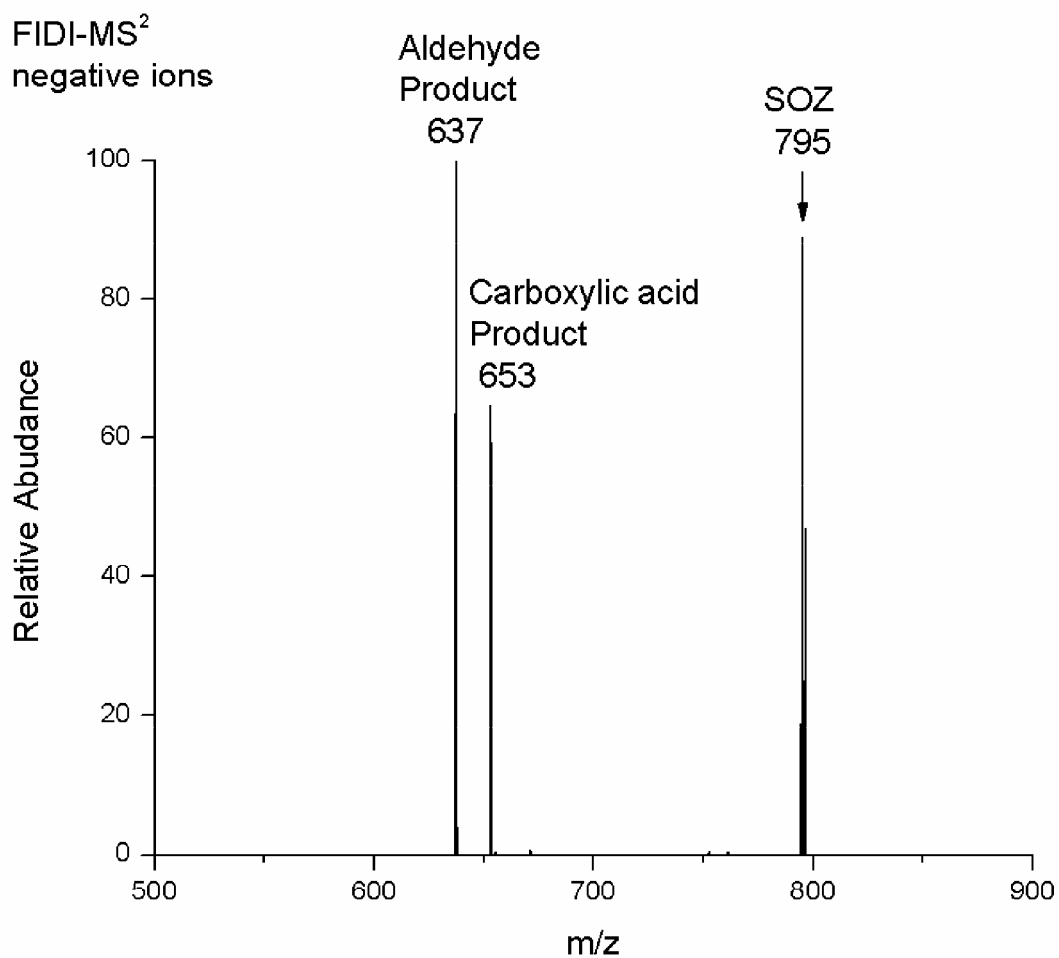

**Figure S1.** The FIDI-MS<sup>2</sup> spectrum of SOZ at m/z 795 showing two competitive products at m/z 637 and at m/z 653, which correspond to the aldehyde and carboxylic acid fragments, respectively.

**Complete Ref. (21)** MacKerell, A. D.; Bashford, D.; Bellott, M.; Dunbrack, R. L.; Evanseck, J. D.; Field, M. J.; Fischer, S.; Gao, J.; Guo, H.; Ha, S.; Joseph-McCarthy, D.; Kuchnir, L.; Kuczera, K.; Lau, F. T. K.; Mattos, C.; Michnick, S.; Ngo, T.; Nguyen, D. T.; Prodhom, B.; Reiher, W. E.; Roux, B.; Schlenkrich, M.; Smith, J. C.; Stote, R.; Straub, J.; Watanabe, M.; Wiorkiewicz-Kuczera, J.; Yin, D.; Karplus, M. *J. Phys. Chem. B* **1998**, *102*, 3586-3616.
